# Supplementary material for: Using GPS collars to investigate the frequency and behavioural outcomes of intraspecific interactions among carnivores: A case study of male cheetahs in the Maasai Mara, Kenya
Source: PubMed Central journal article supplement (PMC6447186; doi:10.1371/journal.pone.0213910), 2019-04-03
Supplement: pone.0213910.s003.pdf [file pone.0213910.s003.pdf]

**Using GPS collars to investigate the frequency and behavioural outcomes of intraspecific interactions among carnivores: A case study of male cheetahs in the Maasai Mara, Kenya**

Femke Broekhuis<sup>1,2\*</sup>, Emily K. Madsen<sup>3</sup>, Kosiom Keiwua<sup>1</sup> and David W. Macdonald<sup>2</sup>

<sup>1</sup> Kenya Wildlife Trust, P.O. Box 86-00502 Karen, Nairobi, Kenya

<sup>2</sup> Wildlife Conservation Research Unit, Department of Zoology, University of Oxford, Recanati-Kaplan Centre, Tubney, OX13 5QL, UK

<sup>3</sup> Centre for Biodiversity and Environmental Research, University College London, Gower Street, London, WC1E 6BT, United Kingdom

\*Corresponding author: Femke Broekhuis

Email: [femke.broekhuis@gmail.com](mailto:femke.broekhuis@gmail.com)

Phone: +254 701 158 737

Journal: PLOS ONE

**Table S1** Summary for Dyad 1 of the distance to the encounter location, distance travelled and tortuosity before and after a possible encounters with proximity threshold of <2000m.

| ID  | Metric                             | Lag (hours) | Before         | After                           | Results                                |
|-----|------------------------------------|-------------|----------------|---------------------------------|----------------------------------------|
| M01 | Distance to encounter location (m) | 3           | 2,620 ± 2,184  | 913 ± 355                       | V = 16, P = 0.31                       |
|     |                                    | 6           | 4,348 ± 3,988  | 2,221 ± 2,185                   | V = 13, P = 0.69                       |
|     |                                    | 12          | 4,292 ± 4,009  | 2,718 ± 3,389                   | V = 16, P = 0.31                       |
|     |                                    | 24          | 6,028 ± 3,568  | 4,471 ± 3,948                   | V = 18, P = 0.16                       |
|     | Distance travelled (m)             | 3           | 2,534 ± 2,052  | 1,436 ± 2,017                   | t <sub>5</sub> = 1.02, P = 0.35        |
|     |                                    | 6           | 4,222 ± 3,665  | 3,226 ± 3,381                   | t <sub>5</sub> = 0.60, P = 0.57        |
|     |                                    | 12          | 5,089 ± 3,320  | 3,965 ± 3,959                   | t <sub>5</sub> = 0.72, P = 0.51        |
|     |                                    | 24          | 11,176 ± 6,867 | 5,256 ± 3,211                   | t <sub>5</sub> = 2.97, P = <b>0.03</b> |
|     | Tortuosity                         | 6           | 0.99 ± 0.01    | 0.87 ± 0.30                     | t <sub>5</sub> = 1.00, P = 0.36        |
|     |                                    | 12          | 0.84 ± 0.29    | 0.86 ± 0.27                     | t <sub>5</sub> = -0.08, P = 0.94       |
| 24  |                                    | 0.60 ± 0.26 | 0.43 ± 0.37    | t <sub>3</sub> = 0.34, P = 0.75 |                                        |
| M02 | Distance to encounter location     | 3           | 1,342 ± 828    | 920 ± 446                       | V = 16, P = 0.31                       |
|     |                                    | 6           | 2,384 ± 1,751  | 1,146 ± 836                     | V = 17, P = 0.22                       |
|     |                                    | 12          | 2,754 ± 1,778  | 1,181 ± 637                     | V = 19, P = 0.09                       |
|     |                                    | 24          | 5,405 ± 4,311  | 2,082 ± 1,372                   | V = 16, P = 0.31                       |
|     | Distance travelled                 | 3           | 1,215 ± 872    | 778 ± 931                       | t <sub>5</sub> = 1.75, P = 0.14        |
|     |                                    | 6           | 2,488 ± 1,901  | 799 ± 916                       | t <sub>5</sub> = 2.23, P = 0.08        |
|     |                                    | 12          | 3,058 ± 1,628  | 1,204 ± 929                     | t <sub>5</sub> = 2.72, P = <b>0.04</b> |
|     |                                    | 24          | 7,398 ± 3,383  | 3,238 ± 2,924                   | t <sub>5</sub> = 2.09, P = 0.09        |
|     | Tortuosity                         | 6           | 0.94 ± 0.89    | 0.27 ± 0.89                     | t <sub>5</sub> = 0.57, P = 0.59        |
|     |                                    | 12          | 0.89 ± 0.13    | 0.81 ± 0.23                     | t <sub>5</sub> = 0.55, P = 0.60        |
| 24  |                                    | 0.68 ± 0.36 | 0.67 ± 0.37    | t <sub>5</sub> = 0.03, P = 0.98 |                                        |

**Table S2** Summary for Dyad 2 of the distance to the encounter location, distance travelled and tortuosity before and after a possible encounters with proximity threshold of <2000m.

| ID  | Metric                             | Lag (hours) | Before        | After                             | Results                                 |
|-----|------------------------------------|-------------|---------------|-----------------------------------|-----------------------------------------|
| M01 | Distance to encounter location (m) | 3           | 2,096 ± 1,617 | 1,731 ± 1,676                     | V = 42, P = 0.46                        |
|     |                                    | 6           | 2,703 ± 1,919 | 2,722 ± 3,033                     | V = 40, P = 0.58                        |
|     |                                    | 12          | 3,827 ± 2,699 | 3,159 ± 2,749                     | V = 41, P = 0.52                        |
|     |                                    | 24          | 4,776 ± 3,395 | 3,293 ± 2,621                     | V = 45, P = 0.32                        |
|     | Distance travelled (m)             | 3           | 1,951 ± 1,657 | 1,465 ± 1,567                     | t <sub>10</sub> = 1.62, P = 0.13        |
|     |                                    | 6           | 3,427 ± 2,812 | 2,563 ± 3,028                     | t <sub>10</sub> = 1.25, P = 0.23        |
|     |                                    | 12          | 5,565 ± 3,453 | 3,792 ± 3,963                     | t <sub>10</sub> = 1.33, P = 0.21        |
|     |                                    | 24          | 9,183 ± 3,940 | 4,736 ± 4,265                     | t <sub>10</sub> = 4.01, P < <b>0.00</b> |
|     | Tortuosity                         | 6           | 0.89 ± 0.14   | 0.97 ± 0.05                       | t <sub>10</sub> = -1.74, P = 0.11       |
|     |                                    | 12          | 0.76 ± 0.24   | 0.75 ± 0.27                       | t <sub>10</sub> = -0.09, P = 0.92       |
| 24  |                                    | 0.50 ± 0.29 | 0.72 ± 0.42   | t <sub>10</sub> = -1.45, P = 0.18 |                                         |
| M03 | Distance to encounter location     | 3           | 1,586 ± 1,533 | 1,327 ± 999                       | V = 40, P = 0.58                        |
|     |                                    | 6           | 2,017 ± 1,604 | 1,432 ± 1,034                     | V = 44, P = 0.37                        |
|     |                                    | 12          | 2,867 ± 1,028 | 2,718 ± 1,172                     | V = 35, P = 0.89                        |
|     |                                    | 24          | 3,455 ± 6,327 | 2,304 ± 2,864                     | V = 13, P = 0.08                        |
|     | Distance travelled                 | 3           | 1,360 ± 1,687 | 1,011 ± 947                       | t <sub>10</sub> = 0.76, P = 0.46        |
|     |                                    | 6           | 2,002 ± 1,705 | 1,201 ± 1,036                     | t <sub>10</sub> = 1.51, P = 0.16        |
|     |                                    | 12          | 4,237 ± 2,543 | 2,638 ± 953                       | t <sub>10</sub> = 2.07, P = 0.06        |
|     |                                    | 24          | 6,007 ± 2,817 | 5,696 ± 4,117                     | t <sub>10</sub> = 0.23, P = 0.82        |
|     | Tortuosity                         | 6           | 0.92 ± 0.11   | 0.87 ± 0.22                       | t <sub>10</sub> = -1.74, P = 0.11       |
|     |                                    | 12          | 0.84 ± 0.11   | 0.92 ± 0.09                       | t <sub>10</sub> = -0.09, P = 0.92       |
| 24  |                                    | 0.61 ± 0.23 | 0.94 ± 0.33   | T <sub>5</sub> = -1.81, P = 0.12  |                                         |

**Table S3** Summary for Dyad 3 of the distance to the encounter location, distance travelled and tortuosity before and after a possible encounters with proximity threshold of <2000m.

| ID  | Metric                             | Lag (hours) | Before        | After                           | Results                          |
|-----|------------------------------------|-------------|---------------|---------------------------------|----------------------------------|
| M02 | Distance to encounter location (m) | 3           | 1,927 ± 2,268 | 718 ± 712                       | V = 24, P = 0.46                 |
|     |                                    | 6           | 3,104 ± 3,959 | 1,126 ± 1,009                   | V = 24, P = 0.46                 |
|     |                                    | 12          | 3,372 ± 4,067 | 1,634 ± 1,512                   | V = 24, P = 0.46                 |
|     |                                    | 24          | 6,332 ± 5,945 | 4,773 ± 5,121                   | V = 22, P = 0.64                 |
|     | Distance travelled (m)             | 3           | 1,791 ± 2,151 | 540 ± 672                       | t <sub>7</sub> = 1.58, P = 0.16  |
|     |                                    | 6           | 3,403 ± 3,804 | 1,025 ± 1,090                   | t <sub>7</sub> = 1.79, P = 0.11  |
|     |                                    | 12          | 3,954 ± 3,899 | 1,731 ± 1,696                   | t <sub>7</sub> = 1.44, P = 0.19  |
|     |                                    | 24          | 8,061 ± 6,251 | 3,245 ± 3,122                   | t <sub>7</sub> = 2.21, P = 0.06  |
|     | Tortuosity                         | 6           | 0.88 ± 0.16   | 0.82 ± 0.25                     | t <sub>7</sub> = 0.55, P = 0.59  |
|     |                                    | 12          | 0.85 ± 0.23   | 0.74 ± 0.30                     | t <sub>7</sub> = 1.13, P = 0.29  |
| 24  |                                    | 0.83 ± 0.14 | 0.58 ± 0.38   | t <sub>7</sub> = 1.63, P = 0.20 |                                  |
| M03 | Distance to encounter location     | 3           | 779 ± 392     | 915 ± 550                       | V = 10, P = 0.31                 |
|     |                                    | 6           | 1,096 ± 461   | 1,187 ± 1,062                   | V = 16, P = 0.84                 |
|     |                                    | 12          | 1,664 ± 1,161 | 2,830 ± 1,228                   | V = 5, P = 0.08                  |
|     |                                    | 24          | 3,333 ± 2,190 | 3,095 ± 1,426                   | V = 21, P = 0.74                 |
|     | Distance travelled                 | 3           | 698 ± 804     | 760 ± 704                       | t <sub>7</sub> = 0.55, P = 0.59  |
|     |                                    | 6           | 1,599 ± 1,533 | 1,201 ± 1,358                   | t <sub>7</sub> = -0.25, P = 0.81 |
|     |                                    | 12          | 2,828 ± 2,256 | 3,638 ± 1,944                   | t <sub>7</sub> = -0.81, P = 0.44 |
|     |                                    | 24          | 5,373 ± 2,705 | 4,964 ± 2,487                   | t <sub>7</sub> = 0.41, P = 0.68  |
|     | Tortuosity                         | 6           | 0.84 ± 0.34   | 0.87 ± 0.15                     | t <sub>7</sub> = -0.27, P = 0.79 |
|     |                                    | 12          | 0.91 ± 0.09   | 0.78 ± 0.16                     | t <sub>7</sub> = 1.79, P = 0.11  |
|     |                                    | 24          | 0.63 ± 0.31   | 0.51 ± 0.17                     | t <sub>7</sub> = -0.24, P = 0.82 |
